# Supplementary material
Source: MDPI journal article supplement (https://www.mdpi.com/1996-1073/10/11/1767)
Supplement: s1 [file s1]

# Supplementary Materials: Heat Modeling and Materials Development of Mg-based Nanomaterials Combined with Solid Oxide Fuel Cell for Stationary Energy Storage

Huaiyu Shao

**Table S1.** Operating conditions of MgH<sub>2</sub> storage and SOFC module.

| Operating Condition       | MgH <sub>2</sub> Storage | SOFC Module |
|---------------------------|--------------------------|-------------|
| Temperature (K)           | 643                      | 1073        |
| Pressure (Mpa)            | 1.0                      | 0.1         |
| Dehydration rate (kmol/h) | 1.0                      | -           |
| Fuel flow rate (kmol/h)   | -                        | 1.0         |
| Air flow rate (kmol/h)    | -                        | 3.0         |

**Table S2.** Module domains and their functions.

| Module Domain            | Detailed Domain | Heat Source                                             | Heat Supplied Line        |
|--------------------------|-----------------|---------------------------------------------------------|---------------------------|
| SOFC                     | SOFC-a          | SOFC anode                                              | -                         |
|                          | SOFC-c          | SOFC cathode                                            | -                         |
|                          | HX-a            | Anode gas pre-heater                                    | SOFC waste heat           |
|                          | HX-c            | Cathode gas pre-heater                                  | SOFC waste heat           |
| MgH <sub>2</sub> Storage | ST              | Gas storage                                             | -                         |
|                          | SEP             | Separator Mg <sub>sol</sub> & H <sub>2</sub>            | -                         |
| Heat Exchanger           | HX1             | Heat exchanger to warm inlet air line                   | Cathode off-gas           |
|                          | HX2             |                                                         | Anode off-gas             |
|                          | HX3-a           | Heat exchanger from off-gas to MgH <sub>2</sub> storage | Anode and cathode off-gas |
|                          | HX3-b           |                                                         |                           |
|                          | HX3-c           |                                                         |                           |
|                          | HX4-a           | Heat exchanger from low temperature off-gas to HX4      | Cathode off-gas           |
|                          | HX4-b           |                                                         | Anode off-gas             |
|                          |                 |                                                         | Heat recovery device      |

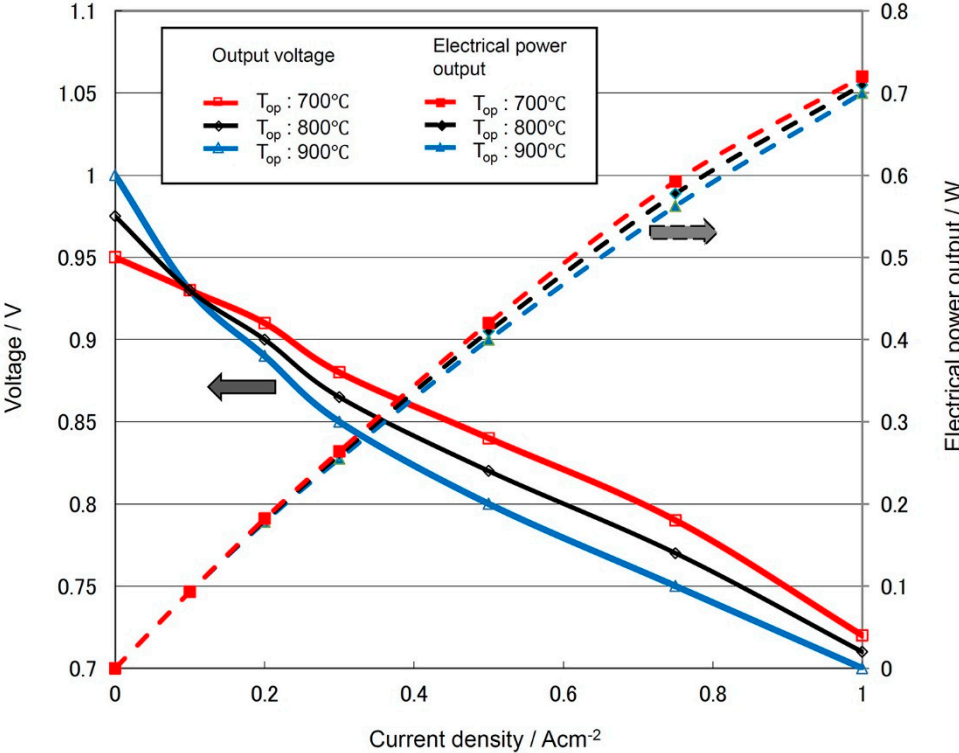

**Figure S1.** SOFC polarization curves. The solid and dashed lines correspond to the left and right axes, respectively.

**Table S3.** The required heat to maintain steady-state operating conditions.

| Required Heat     | H <sub>2</sub> , anode gas flow | Air, cathode gas flow | MgH <sub>2</sub> storage, virtual flow | Total Heat |
|-------------------|---------------------------------|-----------------------|----------------------------------------|------------|
| Temperature       | Heating<br>643→1073 K           | Heating<br>298→1073 K | Keep at 643 K                          | -          |
| Heat Exchanger    | HX-a                            | HX1, HX2, HX-c        | HX3                                    | -          |
| Required Heat (W) | 3554                            | 20,141                | 22,013                                 | 45,708     |

**Table S4.** The available heat from waste heat of off-gas.

| Usable waste heat from flowing gases | Off-gas, off-air, and unused off-air | Off-gas and off-air  | Unused off-air       | Total Heat |
|--------------------------------------|--------------------------------------|----------------------|----------------------|------------|
| Temperature                          | Cooling<br>1073→643 K                | Cooling<br>643→298 K | Cooling<br>643→298 K | -          |
| Heat Exchanger                       | HX3                                  | HX2                  | HX1                  | -          |
| Usable Waste Heat (W)                | 14,459                               | 11,601               | 7252                 | 33,312     |

**Table S5.** Heat balance of the MgH<sub>2</sub> storage and SOFC module.

| Item                                                            | MgH <sub>2</sub> storage | Fuel gas line | Air gas line                             | Total Heat |
|-----------------------------------------------------------------|--------------------------|---------------|------------------------------------------|------------|
| Required Heat to Maintain Steady-State (W)                      | -22,013                  | -3554         | -9,616 (to 643 K)<br>-10,525 (to 1073 K) | -45,708    |
| Waste Heat from Exhaust Gas (W)                                 | 14,459                   | 0             | 18,853 (to 643 K)                        | 33,312     |
| Heating by SOFC Resistive Losses (W)                            | 7554                     | 3554          | 10,525                                   | 21,633     |
| Sum: remaining heat (recovered at HX4 and unused in system) (W) | 0                        | 0             | 9237                                     | 9237       |

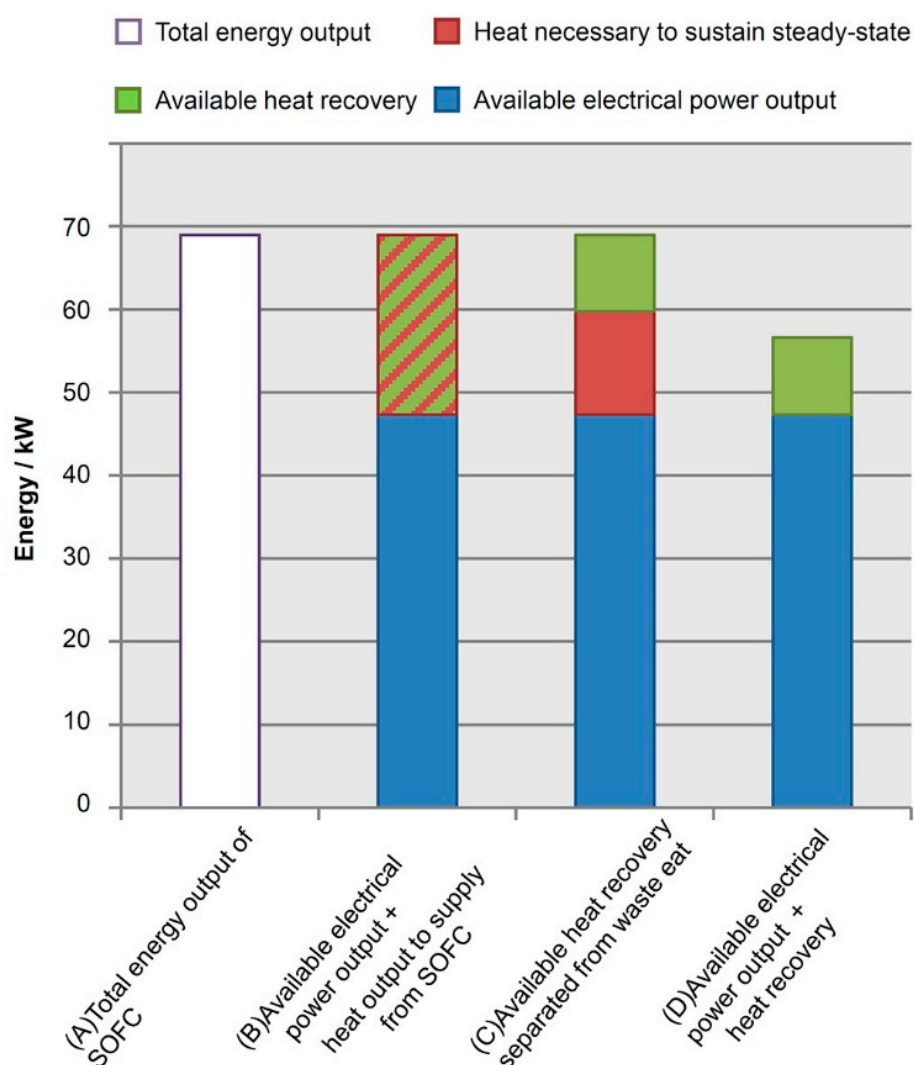**Figure S2.** Available electrical power output and heat recovery from SOFC and MgH<sub>2</sub> storage system.
